# Supplementary material for: Reversion is most likely under high mutation supply when compensatory mutations do not fully restore fitness costs
Source: PubMed Central journal article supplement (PMC9434179; doi:10.1093/g3journal/jkac190), 2022-08-03
Supplement: jkac190_supplementary_data.pdf [file jkac190_supplementary_data.pdf]

## 1 Mathematical supplement

### 2 Probability that the wild type arises before compensatory 3 mutation fixes

4 We calculate the probability that the *WT* mutation occurs before  
5 fixation of the compensatory mutations using the following as-  
6 sumptions. Bacteria can either acquire a compensatory mutation  
7 or a *WT* reversal mutation, not both.

8 The absolute fitness of resistant bacteria  $w_{res} = 1 - c$ . The  
9 absolute fitness of the compensatory mutant  $w_{comp} = 1 - c(1 - p)$ ,  
10 see Figure 1D.

11 We assume that compensatory mutations increase in frequency  
12 deterministically, starting from 1 individual due to selection and  
13 mutation, and the number of resistant bacteria decreases determin-  
14 istically, starting from  $N - 1$ .

The population size of the compensatory bacteria follows:

$$N_{comp}[t + 1] = N_{comp}[t] \cdot w_{comp} / \bar{w}[t] + N_{mut}$$

where  $\bar{w}$  is the average population fitness. The population size of  
resistant bacteria follows:

$$N_{res}[t + 1] = N_{res}[t] \cdot w_{res} / \bar{w}[t] - N_{mut}.$$

The number of mutants from resistant to compensated is

$$N_{mut} = (1 - (1 - \mu)^n) \cdot N_{res}[t] \cdot w_{res} / \bar{w}[t]$$

15 per generation.

16 Now, for each generation, we have the number of resistant  
17 and compensated individuals and the average population fitness,  
18 which allows us to calculate selection coefficient and thus fixation  
19 probability for a *WT* reversal mutation.

In a given generation,  $t$ , the selection coefficient of a *WT* reversal  
mutation is  $s_{wt}[t] = w_{wt} / \bar{w}[t] - 1$  (where  $w_{wt} = 1$ ). The fixation  
probability of such mutation is

$$P_{fix}[t] = (1 - e^{(-2s_{wt}[t])}) / (1 - e^{(-4Ns_{wt}[t])})$$

20 (Kimura 1957; Patwa and Wahl 2008), which simplifies to  $P_{fix}[t] =$   
21  $2s_{wt}[t]$  when  $s$  is not too large (Haldane 1927).

The probability that at least one successful reversal mutation oc-  
curs in a generation,  $P_{wt}[t]$ , is calculated as 1 minus the probability  
that none of the resistant individuals mutates and fixes.

$$P_{wt}[t] = 1 - (1 - \mu \cdot P_{fix}[t])^{N_{res}[t]}$$

The total probability of a successful *WT* reversal mutation  
before the compensatory mutations fix is calculated as a sum over  
all generations:

$$P_{tot} = \sum_{t=1}^{\infty} (P_{wt}[t]) \cdot \prod_{d=1}^{t-1} (1 - P_{wt}[d])$$

22 where the product denotes the probability that no successful *WT*  
23 mutation had occurred in previous generations.

24 Even though we sum to infinity, the opportunity for *WT*  
25 mutants in this model only lasts until the compensatory muta-  
26 tions have fixed. Over time, as the number of resistant (non-  
27 compensated) bacteria goes down, the mutational supply of *WT*  
28 reversals goes down too (because here only resistant bacteria can  
29 mutate to *WT*). In addition, the population fitness ( $\bar{w}$ ) goes up, so  
30 the selection coefficient ( $s_{wt}$ ) and therefore the fixation probability  
31  $P_{fix}$  for *WT* goes down. To calculate the probabilities for Figures  
32 2A and 2B we sum over 500 generations.

## Experimental supplement

For further clarity on the experimental results, we will briefly  
describe the results from 5 of the experimental *E. coli* populations  
as observed in (Avrani et al. 2020):

- Each of these 5 experimental populations was initiated from  
a clone with an adaptive mutation in the RNA polymerase  
core enzyme that increases fitness under long-term stationary  
phase – but that is costly in rich media. (Avrani et al. 2020).
- One clone (2.1) had a normal mutation rate of  $3.48 \cdot 10^{-9}$  per  
site. The other four clones were mutators, deficient in their  
mismatch repair, resulting in much higher mutation rates.
- Three of the clones (4.1, 4.5 and 4.9) had the same specific  
mutator allele, resulting in a mutation rate estimated to be  
672-fold higher than that of the non-mutator clone.
- The remaining mutator clone (2.2) carried a different mutator  
allele resulting in a mutation rate 165-fold higher than that of  
the non-mutator.

These five experimental populations underwent daily dilutions  
into fresh media for 16 growth cycles, which corresponds to around  
100 generations. During the serial dilution experiments, all five  
clones greatly improved the rate at which they grew exponentially  
in fresh media.

After 100 generations of evolution, 9-10 clones from each of  
the resulting populations were fully sequenced. This allowed us  
to examine whether the observed improvements in growth rate  
were achieved through compensation, reversion, or a combination  
of both. As can be seen, for the non-mutator populations, all 10  
sequenced bacteria carried a compensatory mutation, while still  
maintaining their original costly mutation. While each clone car-  
ried a single compensatory mutation, four different compensatory  
mutations were observed within the population, indicating that  
this population adapted through a soft sweep (Hermisson and Pen-  
nings 2017). These results were quite similar to what we observed  
in our simulations, when  $N\mu$  was set to 0.1 (Figure 4C) (Avrani et al.  
2011). In the experiments with mutator strains, both compensatory  
and reversal mutations were observed (Figure 4F).

## Literature cited

Avrani S, Katz S, Hershberg R. 2020. Ad aptations accumu-  
lated under prolonged resource exhaustion are highly transient.  
MSphere. 5. <https://doi.org/10.1128/mSphere.00388-20>.

Avrani S, Wurtzel O, Sharon I, Sorek R, Lindell D. 2011. Ge-  
nomic island variability facilitates prochlorococcus –virus coexis-  
tence. Nature. 474:604–608. <https://doi.org/10.1038/nature10172>.

Hermisson J, Pennings PS. 2017. Soft sweeps and beyond: Un-  
derstanding the patterns and probabilities of selection footprints  
under rapid adaptation. Methods in Ecology and Evolution. 8:700–  
716. <https://doi.org/10.1111/2041-210X.12808>.

Kimura M. 1957. Some problems of stochastic processes in  
genetics. The Annals of Mathematical Statistics. pp. 882–901.

Patwa Z, Wahl LM. 2008. The fixation probability of beneficial  
mutations. Journal of The Royal Society Interface. 5:1279–1289.
